# Supplementary material for: The DIAPH3/RPL6 axis regulates the cGAS-STING pathway in pancreatic cancer
Source: Research Square preprint supplement (doi:10.21203/rs.3.rs-7509327/v1), 2025-09-17
Supplement: Supplementary file 1 [file c9b0a7a47b8f266dcaad68a2.docx]

Table S1 The list of sh RNA sequences

| Gene name | shRNA sequence (5’-3’) |
| --- | --- |
| shDIAPH3 1# | aacctgaagactgcatttgca |
| shDIAPH3 2# | aacttctctctgcggtatgca |
| shOTUD4 1# | aagactgctgctgctgctgct |
| shOTUD4 2# | aacgtgattattccattgctg |
| shRPL6 1# | aagaaggggaagccccattgc |
| shRPL6 2# | aagaagaagaagctgcggaag |
